# Supplementary material
Source: Royal Society of Chemistry journal article supplement (doi:10.1039/d6se00450d)
Supplement: d6se00450d1.pdf [file d6se00450d1.pdf]

## Supporting Information

### **Creation of anaerobic microenvironments by Photosystem I in porous glass nanopores enables photoinduced H<sub>2</sub> evolution under aerobic conditions**

*Makoto Hirano<sup>a</sup>, Tomoyasu Noji<sup>b,c</sup>, Keisuke Kawakami<sup>d</sup>, Tetsuro Jin<sup>e</sup>, Nobuo Kamiya<sup>f</sup>, Yutaka Amao<sup>\*a,f</sup>*

<sup>a</sup> Graduate School of Science, Osaka Metropolitan University, 3-3-138 Sugimoto, Sumiyoshi-ku, Osaka, Japan

<sup>b</sup> Department of Applied Chemistry, The University of Tokyo, 7-3-1 Hongo, Bunkyo-ku, Tokyo 113-8654, Japan

<sup>c</sup> Research Center for Advanced Science and Technology, The University of Tokyo, 4-6-1 Komaba, Meguro-ku, Tokyo 153-8904, Japan

<sup>d</sup> Biostructural Mechanism Laboratory, RIKEN SPring-8 Center, 1-1-1 Kouto, Sayo, Hyogo 679-5148, Japan

<sup>e</sup> Nanomaterials Research Institute (NMRI), National Institute of Advanced Industrial Science and Technology (AIST), 1-8-31 Midorigaoka, Ikeda, Osaka 563-8577, Japan

<sup>f</sup> Research Centre for Artificial Photosynthesis, Osaka Metropolitan University, 3-3-138 Sugimoto, Sumiyoshi-ku, Osaka 558-8585, Japan

Corresponding author: Y.A. ([amao@omu.ac.jp](mailto:amao@omu.ac.jp))

## **Contents**

16 pages

1 table

14 Figures

### [Solution of the Kinetic Model for the P700<sup>+</sup> State]

The time dependence of the total PSI population in the P700<sup>+</sup> state was obtained by solving the following revised coupled rate equations for  $[P700^+ - F_B^-]$ ,  $[P700^+ - F_B]$  and  $[P700 - F_B^-]$ .

$$\frac{d[P700^+ - F_B^-]}{dt} = -(k_1 + k_2 + k_3)[P700^+ - F_B^-] \quad (S1)$$

$$\frac{d[P700^+ - F_B]}{dt} = -k_3[P700^+ - F_B] + k_2[P700^+ - F_B^-] \quad (S2)$$

$$\frac{d[P700 - F_B^-]}{dt} = -k_2[P700 - F_B^-] + k_3[P700^+ - F_B^-] \quad (S3)$$

With  $t = 0$ , Equation. S1 gives

$$[P700^+ - F_B^-] = [P700^+ - F_B^-]_0 e^{-(k_1 + k_2 + k_3)t} \quad (S4)$$

Substitution of Equation. S4 into Equation. S2 and solution by an integrating factor  $e^{k_3 t}$  yields

$$[P700^+ - F_B] = \frac{k_2[P700^+ - F_B^-]_0}{k_1 + k_2} (e^{-k_3 t} - e^{-(k_1 + k_2 + k_3)t}) \quad (S5)$$

The state  $[P700 - F_B^-]$  is obtained by integrating Equation S3:

$$[P700 - F_B^-] = \frac{k_3[P700^+ - F_B^-]_0}{k_1 + k_3} (e^{-k_2 t} - e^{-(k_1 + k_2 + k_3)t}) \quad (S6)$$

Because  $[P700 - F_B^-]$  does not contain oxidized P700, this state does not contribute to the P700<sup>+</sup> absorption signal and is therefore not included in the total P700<sup>+</sup> population.

$$[P700^+] = [P700^+ - F_B^-] + [P700^+ - F_B] \quad (S7)$$

and thus

$$[P700^+] = [P700^+ - F_B^-]_0 \left( \frac{k_1}{k_1 + k_2} e^{-(k_1 + k_2 + k_3)t} + \frac{k_2}{k_1 + k_2} e^{-k_3 t} \right) \quad (S8)$$

which is identical to Equation 5 in the main text.

**[Definitions of TON and O<sub>2</sub> Tolerance]**

$$TON = \frac{n_{H_2}}{n_{PSI}} \text{ (S9)}$$

where  $n_{H_2}$  is the amount of H<sub>2</sub> evolved during illumination (mol), and  $n_{PSI}$  is the amount of PSI present in the reaction system (mol).

$$O_2 \text{ tolerance (\%)} = 100 \times \frac{TON_{aerobic}}{TON_{anaerobic}} \text{ (S10)}$$

where  $TON_{aerobic}$  and  $TON_{anaerobic}$  are TON values measured under aerobic and anaerobic conditions, respectively.

**Table S1.** Rate constant  $k_3$  obtained by fitting the transient absorption time courses of PSI in solution and PGP-immobilized PSI.

|           |                            | rate constant (s <sup>-1</sup> ) |      |
|-----------|----------------------------|----------------------------------|------|
|           |                            | $k_3$                            |      |
| condition | Pre-irradiation time (min) | solution                         | PGP  |
| aerobic   | 0                          | 0.49                             | 0.34 |
|           | 1                          | 0.50                             | 0.36 |
|           | 2                          | —                                | 0.57 |
|           | 3                          | 0.50                             | 0.74 |
|           | 5                          | 0.51                             | 0.96 |
|           | 7                          | —                                | 0.60 |
|           | 10                         | 0.51                             | 0.56 |
|           | anaerobic                  |                                  | 0.60 |

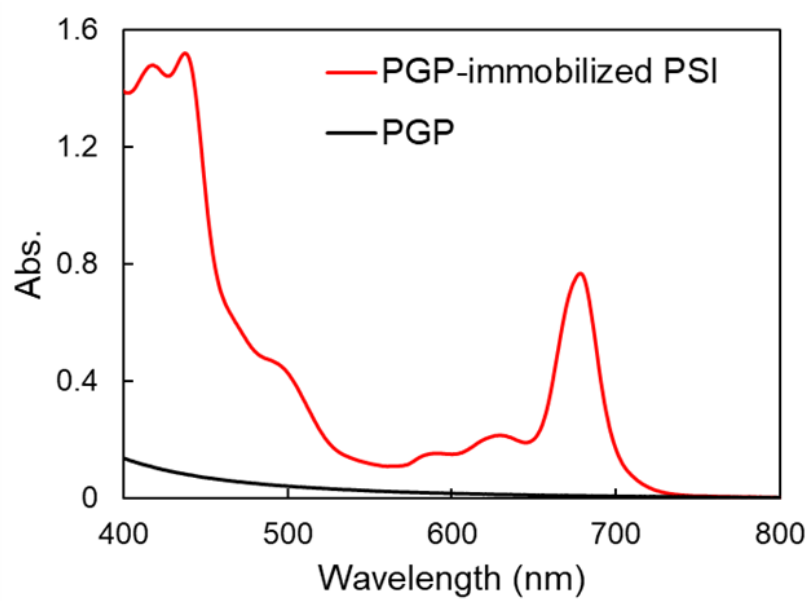

**Figure S1.** UV-vis absorption spectra of porous glass plate (PGP) (black) and PGP-immobilized photosystem I (PSI) (red).

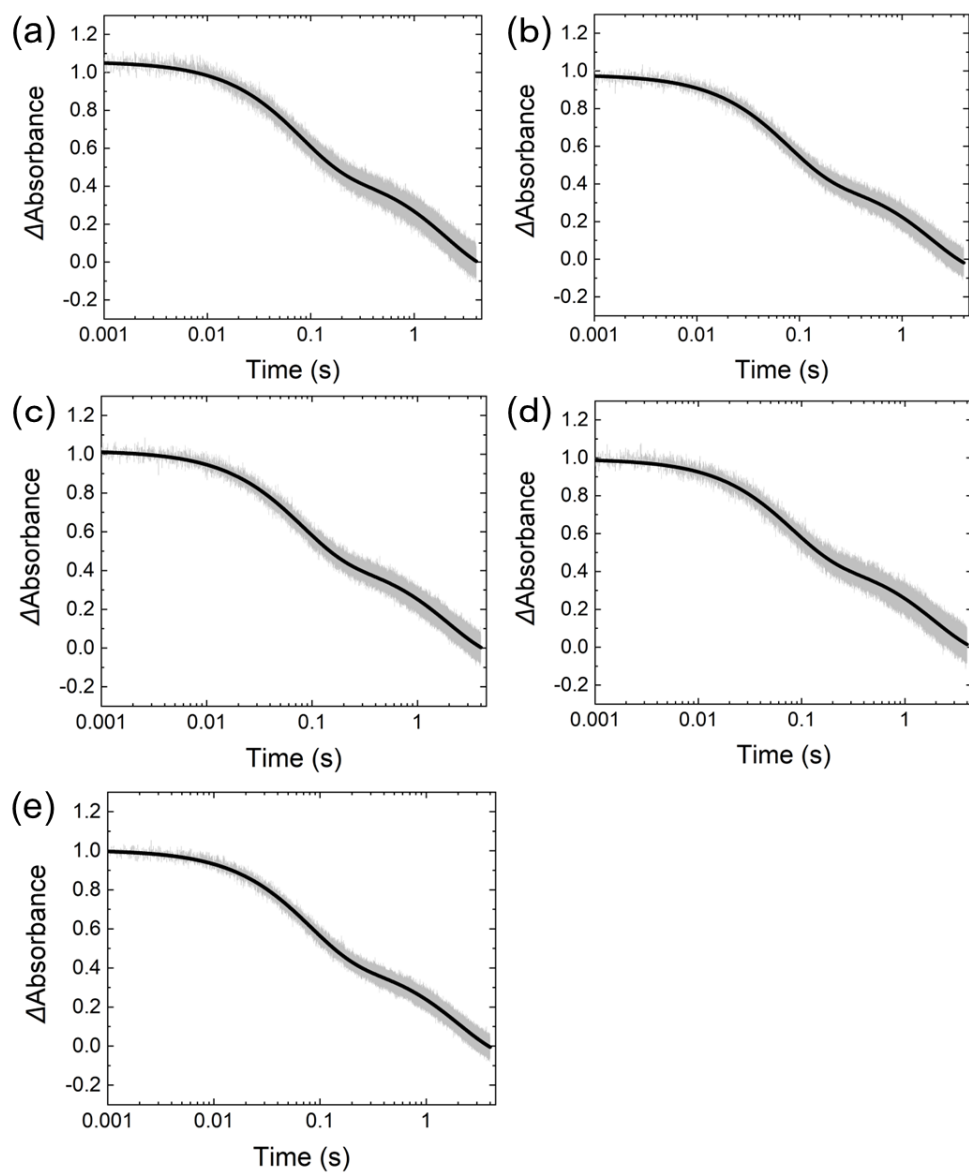

**Figure S2.** Pre-irradiation time dependence of transient absorption decay in PSI. Transient absorption decay time courses of PSI in solution recorded after (a) 0, (b) 1, (c) 3, (d) 5 and (e) 10 min of pre-irradiation. Colored lines represent the best-fit curves obtained using Equation. 5.

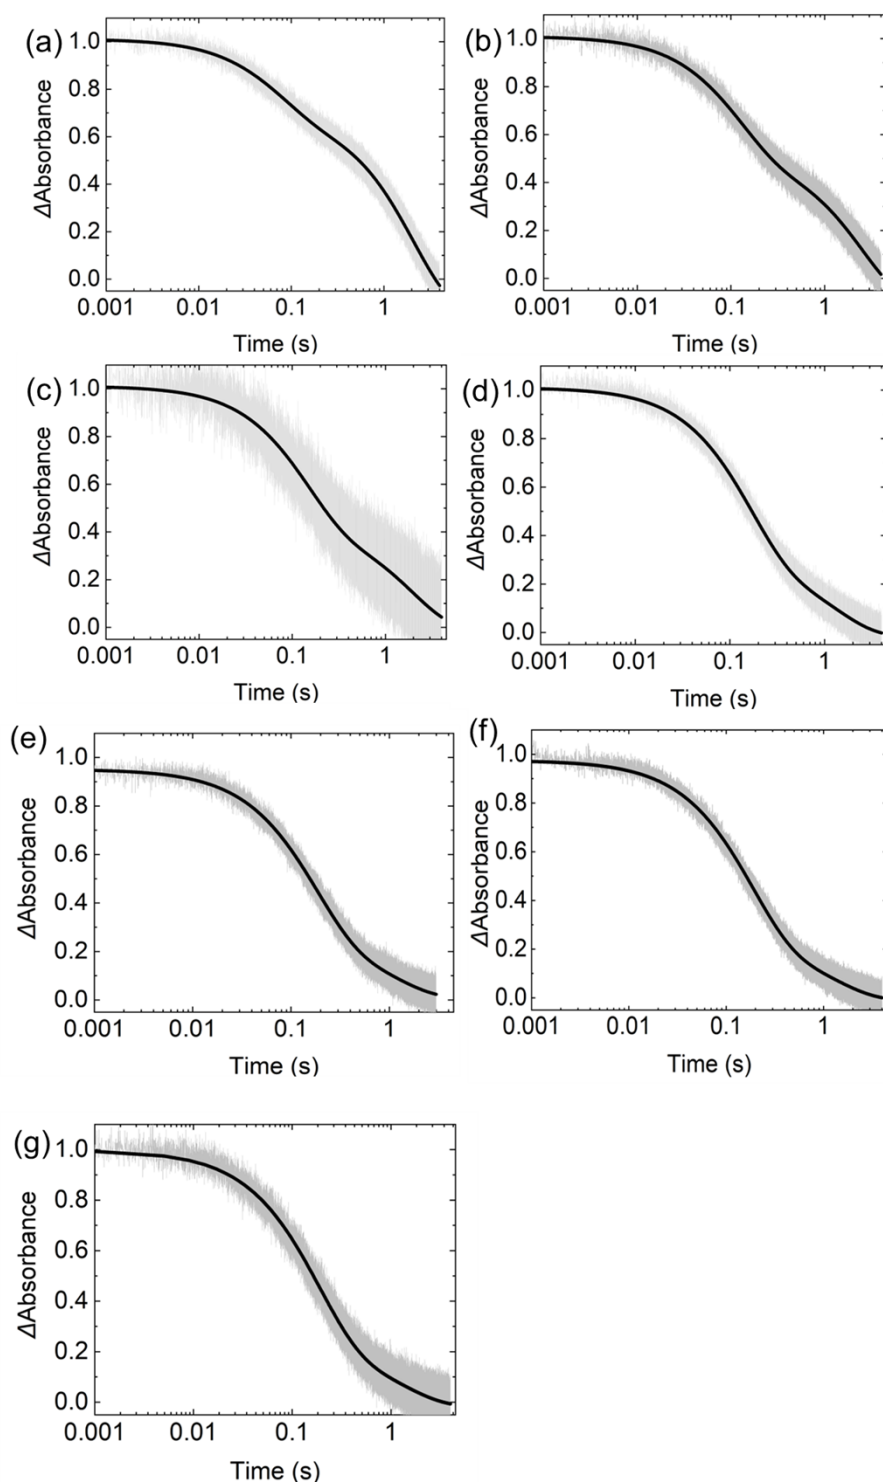

**Figure S3.** Pre-irradiation time dependence of transient absorption decay in PSI. Transient absorption decay time courses for PGP-immobilized PSI recorded after (a) 0, (b) 1, (c) 2, (d) 3, (e) 5, (f) 7 and (g) 10 min of pre-irradiation. Gray lines show experimental results. Colored lines represent the best-fit curves obtained using Equation. 5.

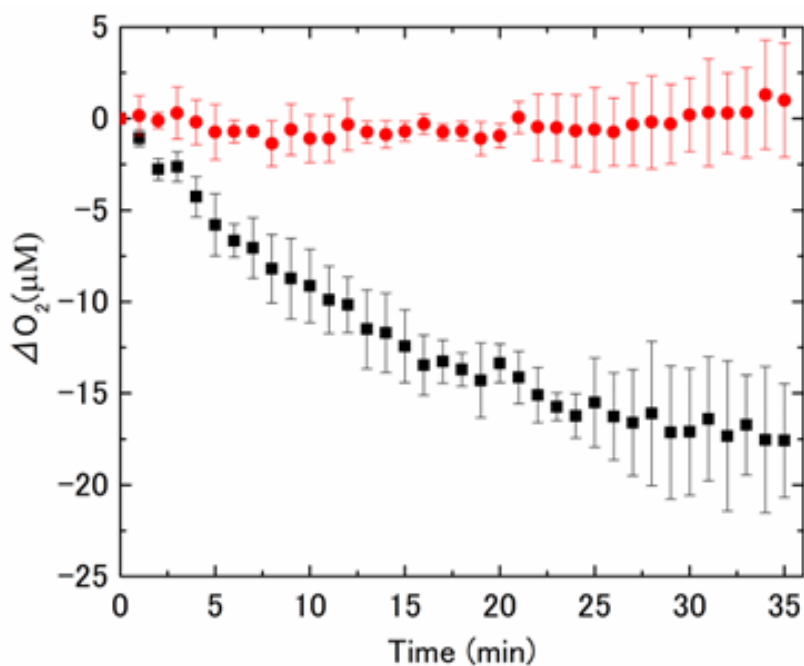

**Figure S4.** Time course of dissolved  $O_2$  concentration in PSI solution under aerobic conditions. Dissolved  $O_2$  concentration was monitored using a NeoFox-GT oxygen monitor equipped with a standard sensor probe (Ocean Optics). The PSI solution was prepared under the same solution conditions as those used for TAS measurements:  $180 \text{ nmol L}^{-1}$  PSI in  $40 \text{ mmol L}^{-1}$  HEPES–NaOH buffer (pH 7.8) containing  $50 \text{ mmol L}^{-1}$  NaCl,  $10 \text{ mmol L}^{-1}$  ascorbic acid,  $0.1 \text{ mmol L}^{-1}$  DCIP, and 0.03% (w/v) DM. The irradiation conditions were the same as those used for the light-driven  $H_2$  evolution experiments. Black squares: under light irradiation; red circles: without light irradiation.

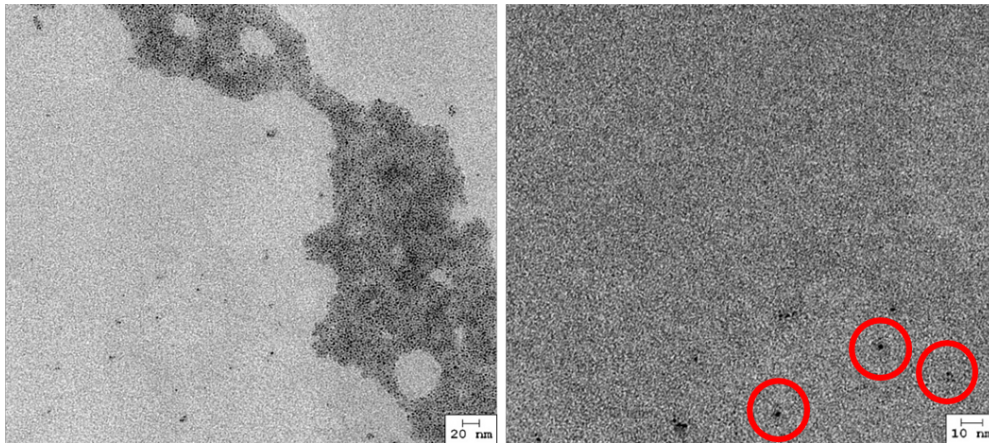

**Figure S5.** TEM images of Pt nanoparticles (PtNPs) at magnifications of  $\times 4,000$  (left) and  $\times 10,000$  (right). The particle diameter estimated from the TEM images was approximately 2 nm.

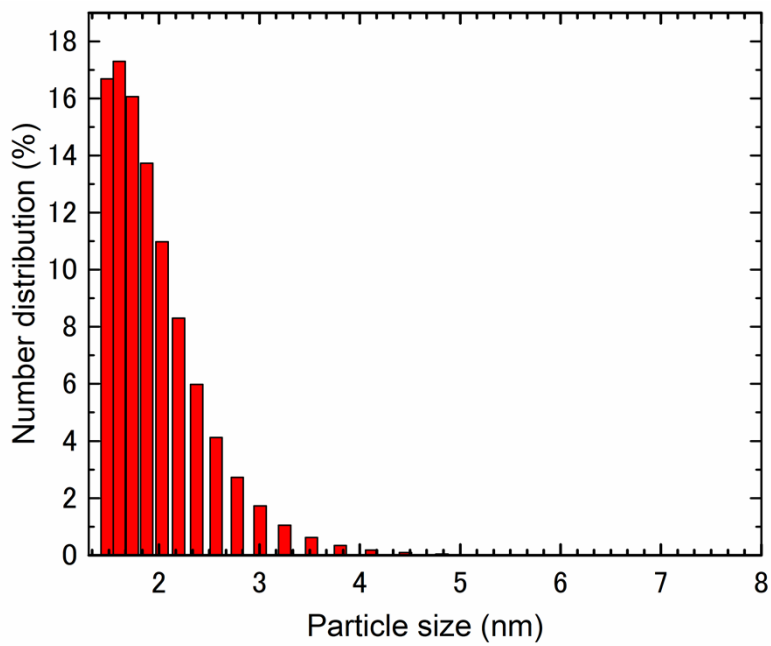

**Figure S6.** Particle size distribution of the synthesized PtNPs measured by DLS. The mean particle diameter was  $1.8 \pm 0.6$  nm.

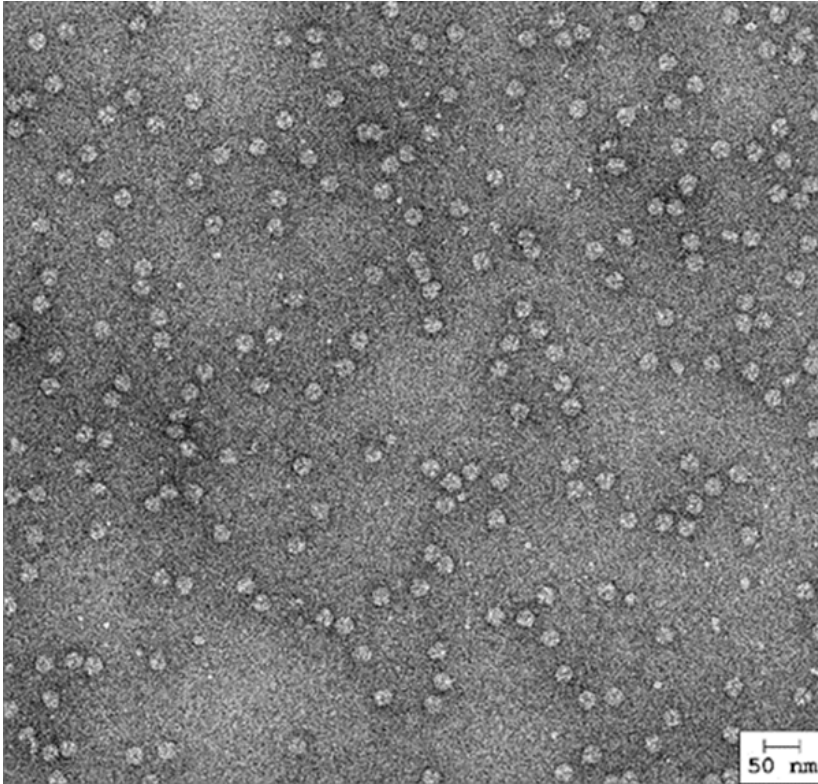

**Figure S7.** TEM image of PSI (magnification:  $\times 20,000$ ).

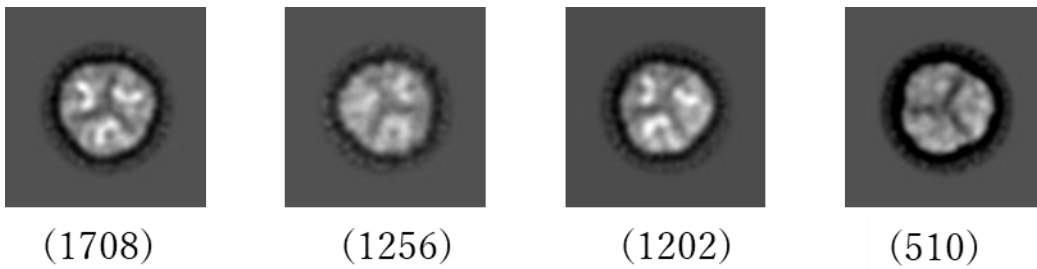

**Figure S8.** Negative-stain TEM 2D class averages of PSI. Numbers in parentheses indicate the number of particles contributing to each class-average image. In total, 4,676 particle images obtained from 65 micrographs were classified into four classes, followed by 2D class averaging.

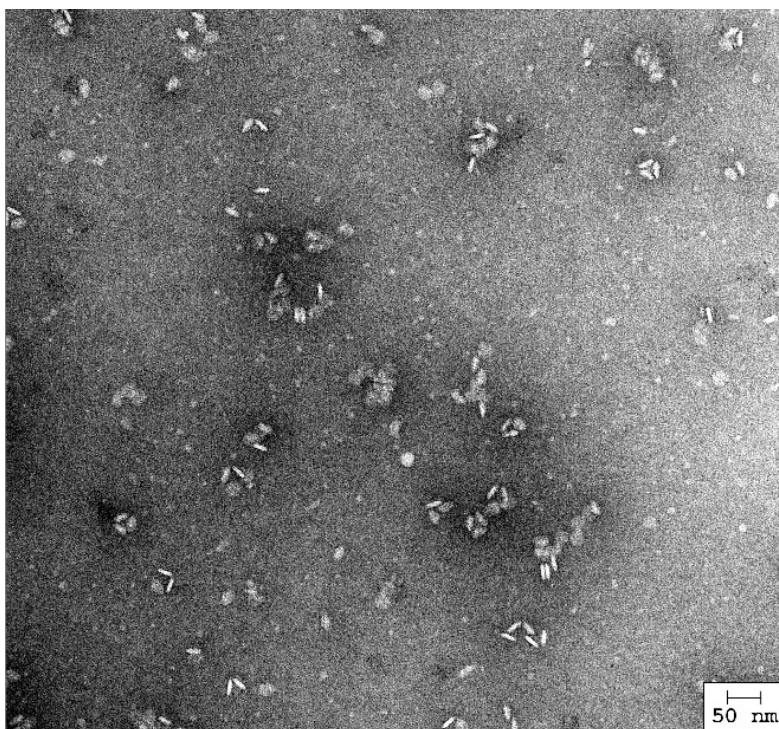

**Figure S9.** TEM image of PSI-PtNP (magnification:  $\times 20,000$ ).

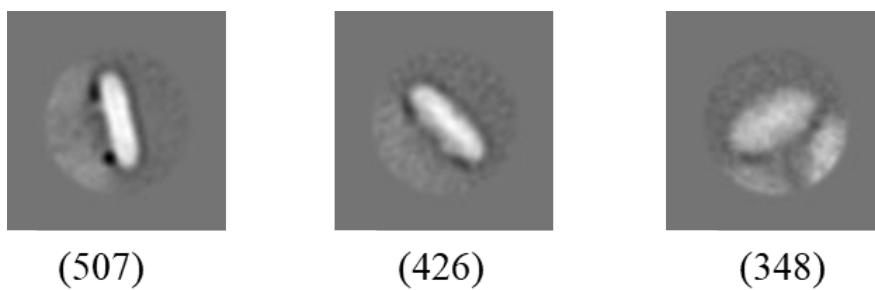

**Figure S10.** Negative-stain TEM 2D class averages of PSI-PtNP. Numbers in parentheses indicate the number of particles contributing to each class-average image. A total of 1,281 particle images extracted from 65 micrographs were classified into three classes in RELION, followed by 2D class averaging.

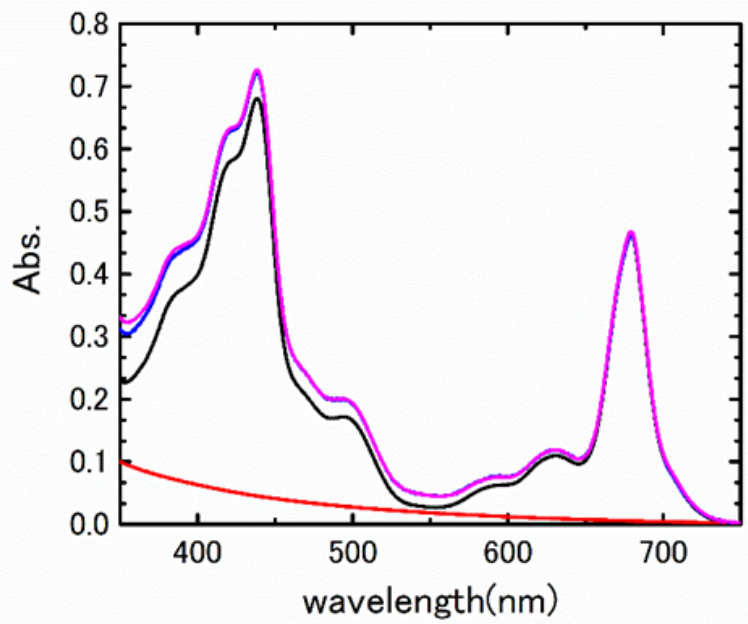

**Figure S11.** UV-vis absorption spectra of PSI ( $0.084 \mu\text{mol L}^{-1}$ ; black) and PtNP ( $0.084 \mu\text{mol L}^{-1}$ ; red). The calculated spectrum obtained by arithmetically summing the PSI and PtNP spectra at a 1:1 stoichiometric ratio (pink) closely matches the spectrum of the synthesized PSI-PtNP complex (blue), consistent with a 1:1 binding stoichiometry between PSI and PtNP.

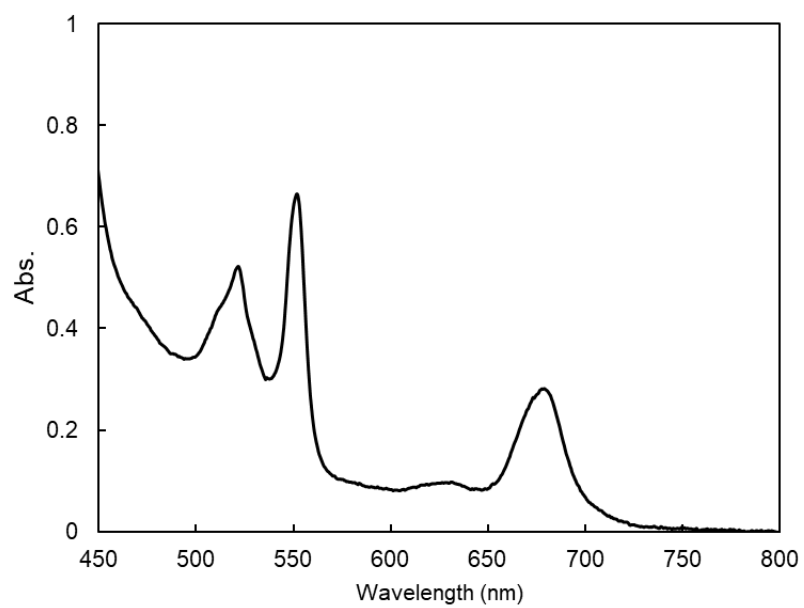

**Figure S12.** UV-vis absorption spectrum of a PGP co-immobilized with PSI-PtNP and cyt *c*<sub>6</sub>.

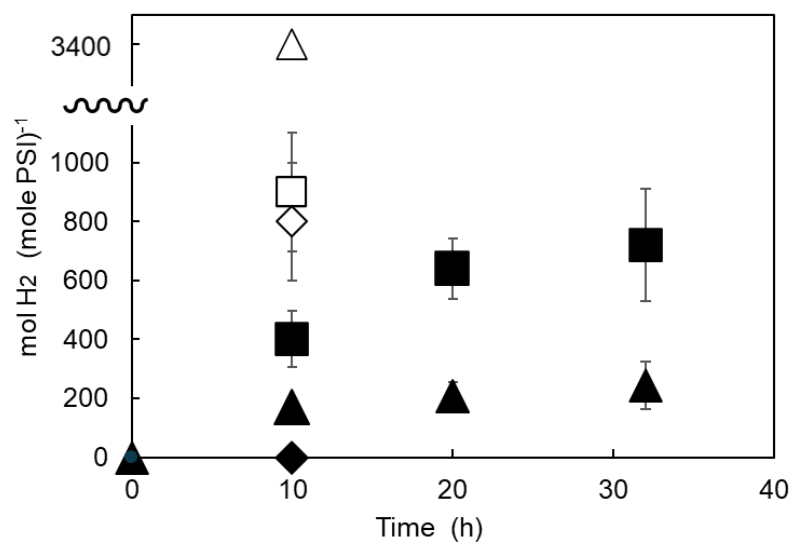

**Figure S13.** Light-driven H<sub>2</sub> evolution in solution and PGP systems. Squares represent the PGP system with co-immobilized PSI–PtNP and cyt *c*<sub>6</sub>. The solution-phase system is represented by triangles (stirred) and diamonds (unstirred). Filled symbols indicate aerobic conditions, whereas open symbols indicate anaerobic conditions (data shown only at 10 h).

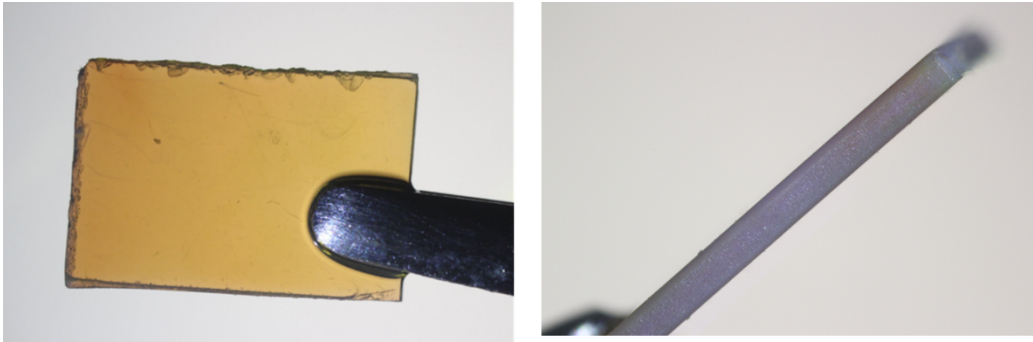

**Figure S14.** PGP co-immobilized with PSI–PtNP and cyt  $c_6$ . The left panel shows the surface of the plate, and the right panel shows the side view.
